# Supplementary material for: Efficacy and Safety of 2 Fingolimod Doses vs Glatiramer Acetate for the Treatment of Patients With Relapsing-Remitting Multiple Sclerosis: A Randomized Clinical Trial
Source: PubMed Central journal article supplement (PMC7445630; doi:10.1001/jamaneurol.2020.2950), 2020-08-24
Supplement: jamaneurol-e202950-s003.pdf [file jamaneurol-e202950-s003.pdf]

# Data Sharing Statement

Cree. Efficacy and Safety of 2 Fingolimod Doses vs Glatiramer Acetate for the Treatment of Patients With Relapsing-Remitting Multiple Sclerosis. *JAMA Neurol*. Published August 24, 2020. 10.1001/jamaneurol.2020.2950

## Data

**Data available:** Yes

**Data types:** Deidentified participant data

**How to access data:** Anonymized data from the study are available on reasonable request from the authors, provided that it is in line with current ethical and intellectual property requirements surrounding the use of data. Requests should be directed to the corresponding author by email. [Bruce.Cree@UCSF.edu](mailto:Bruce.Cree@UCSF.edu)

**When available:** With publication

## Supporting Documents

**Document types:** None

## Additional Information

**Who can access the data:** Anonymized data from the study are available on reasonable request from the authors, provided that it is in line with current ethical and intellectual property requirements surrounding the use of data. Requests should be directed to the corresponding author by email. [Bruce.Cree@UCSF.edu](mailto:Bruce.Cree@UCSF.edu)

**Types of analyses:** Anonymized data from the study are available on reasonable request from the authors, provided that it is in line with current ethical and intellectual property requirements surrounding the use of data. Requests should be directed to the corresponding author by email. [Bruce.Cree@UCSF.edu](mailto:Bruce.Cree@UCSF.edu)

**Mechanisms of data availability:** Anonymized data from the study are available on reasonable request from the authors, provided that it is in line with current ethical and intellectual property requirements surrounding the use of data. Requests should be directed to the corresponding author by email. [Bruce.Cree@UCSF.edu](mailto:Bruce.Cree@UCSF.edu)
